# Supplementary material for: Bio-Inspired Supramolecular Chemistry Provides Highly Concentrated Dispersions of Carbon Nanotubes in Polythiophene
Source: MDPI journal article supplement (doi:10.3390/ma9060438), 2016-06-02
Supplement: s1 [file s1]

# Supplementary Materials: Bio-Inspired Supramolecular Chemistry Provides Highly Concentrated Dispersions of Carbon Nanotubes in Polythiophene

Yen-Ting Lin, Ranjodh Singh, Shiao-Wei Kuo and Fu-Hsiang Ko

## Synthesis of 3-(Adeninehexyl Thiophene)

We dissolved 3-bromothiophene (*a*, 30 g, 0.18 mol) in 250 mL of n-hexane and decreased the temperature to  $-40\text{ }^{\circ}\text{C}$ . After injection of n-BuLi, the solution was stirred for 10 min, and then, THF was added slowly through a syringe (15–20 mL) until an insoluble white precipitate of 3-lithiothiophene salt was formed. We ramped the temperature from  $-40\text{ }^{\circ}\text{C}$  to  $-10\text{ }^{\circ}\text{C}$  and stirred for 1 h. Dried THF (5–10 mL) and 1,6-dibromohexane (*b*, 110 mL, 0.72 mol) were added in the mixture and then stirred for 2 h at room temperature. When the reaction was complete, we used ether and water for extraction. After rotary evaporation of the organic phase, we gained a colorless and oily precursor (*c*, 27.39 g, yield 61%) under low-pressure ( $90\text{--}100\text{ }^{\circ}\text{C}$ , 0.05 mmHg) distillation. We dissolved the measured precursor (*c*, 2.79 g, 20.0 mmol), calcium carbonate (5.58 g, 40.0 mmol) and adenine (5.40 g, 40 mmol) in dried DMF (200 mL) and stirred the mixture under  $60\text{ }^{\circ}\text{C}$  for 24 h. When the reaction was complete, we cooled it to room temperature, filtered out insoluble solids and removed the DMF by low-pressure distillation. Finally, we re-crystallized the mixture in toluene to obtain 3-adeninehexyl thiophene monomer (*d*, 5 g, yield 45%). The monomer structure was confirmed by  $^1\text{H}$  NMR (300 MHz,  $\text{CDCl}_3$ )  $\delta$  = 1.34 (m, 4H), 1.65 (br, 2H), 2.60 (m, 2H), 3.68 (t, 2H), 5.65 (d, 1H), 6.89 (d, 1H), 7.08 (d, 1H), 7.21 (d, 1H), and 8.80 (s, 1H) ppm and  $^{13}\text{C}$  NMR (75 MHz,  $\text{CDCl}_3$ ):  $\delta$  = 26.45, 28.96, 29.19, 30.30, 30.49, 49.06, 102.34, 120.17, 125.45, 128.40, 142.96, 144.65, 151.15, and 164.18 ppm.

## Synthesis of Poly(3-Adeninehexyl Thiophene) (PAT)

We placed  $\text{FeCl}_3$  (4 g, 137 mol) in a 250 mL double-neck bottom with dehumidified air under Ar atmosphere. We used a small amount of dried chloroform to dissolve the  $\text{FeCl}_3$  in a cooling bath and diluted 3-adeninehexyl thiophene (*d*, 1.73 g, 5.74 mmol) in 20 mL of dried chloroform. We slowly injected 3-adeninehexyl thiophene dilution in  $\text{FeCl}_3$  solution under a cooling bath and allowed the reaction to proceed for several days to ensure that polymerization was complete. We removed the chloroform by low-pressure distillation and added methanol and a small amount of hydrazine to wash the crude product. We further purified the mixture by Soxhlet Extraction and removed methanol to obtain poly(3-adeninehexyl thiophene) (PAT), which was confirmed by  $^1\text{H}$  NMR (400 MHz,  $\text{DMSO}-d_6$ ):  $\delta$  = 1.20 (m, 4H), 1.53 (m, 2H), 1.71 (m, 2H), 2.65 (t, 2H), 4.05 (t, 2H), 7.07 (s, 1H), 7.20 (s, 2H), 8.08 (s, 2H) (Figure S2). IR (KBr):  $3250\text{ cm}^{-1}$ ,  $2835\text{ cm}^{-1}$ ,  $1615\text{ cm}^{-1}$ ,  $520\text{ cm}^{-1}$ , and  $710\text{ cm}^{-1}$  (Figure 1) and MS (EI),  $m/z$  [ $\text{M}^+$ ]: 2840, calculated: 2840.68.

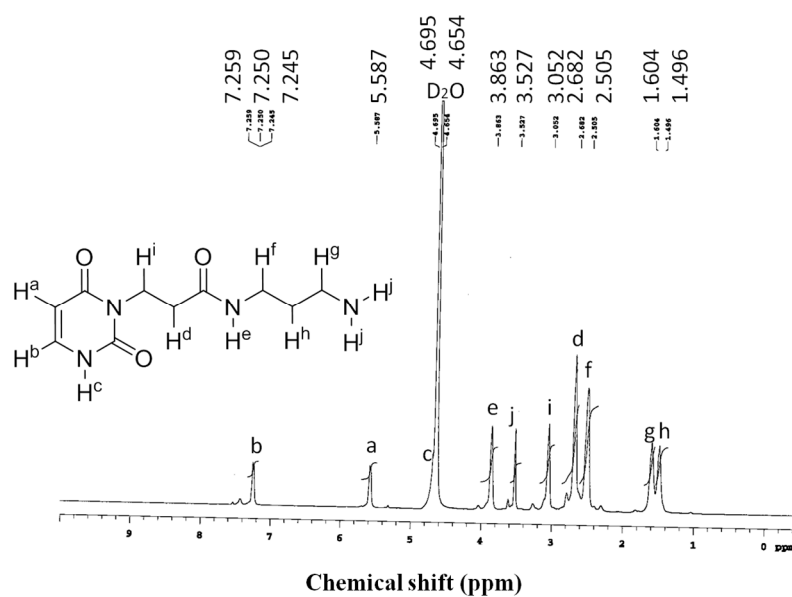

**Figure S1.**  $^1\text{H}$  NMR result for U derivative.

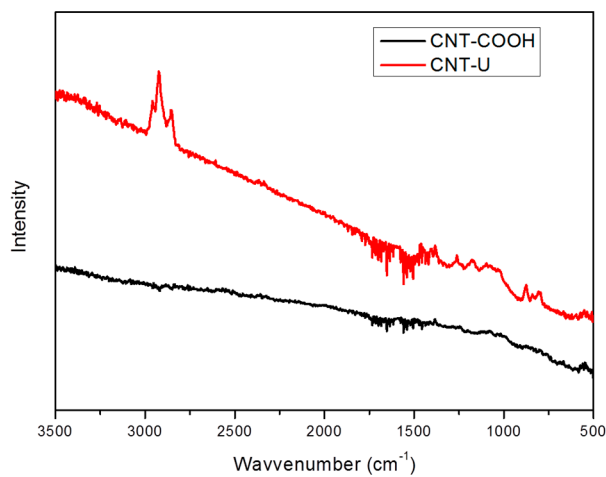

**Figure S2.** FT-IR (KBr pellet) result for monitoring modification of CNT-COOH (black) and grafted CNT-U (red).

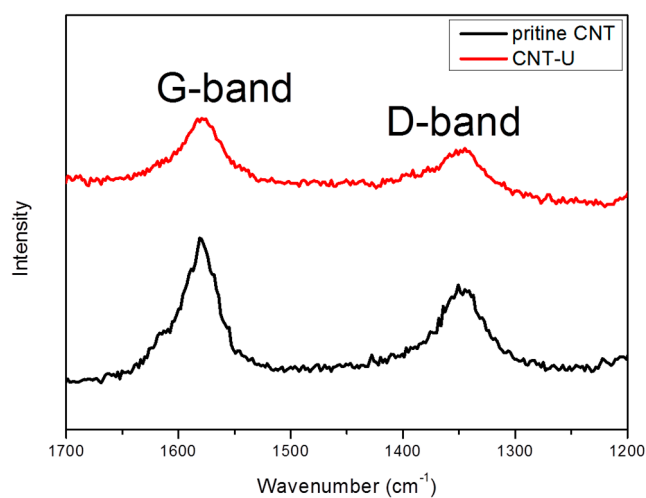

**Figure S3.** Raman result for monitoring modification of non-modified CNT-COOH (black) and grafted CNT-U (red).

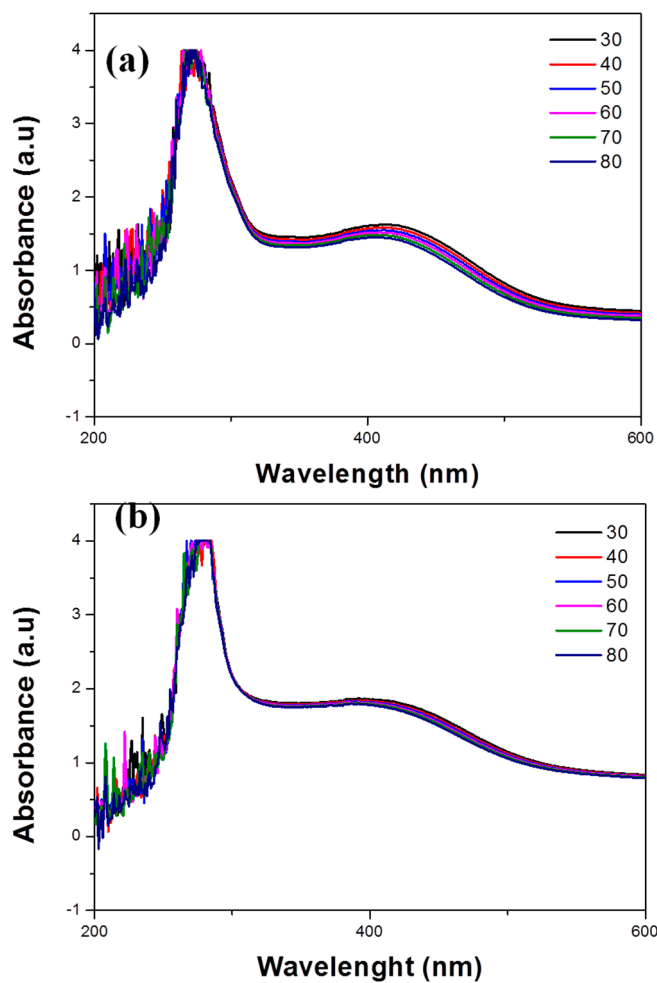

**Figure S4.** Stability of (a) commercial MWCNT-COOH and (b) self-made MWCNT-COOH by temperature oscillation study (30–80 °C) by UV-vis spectra.

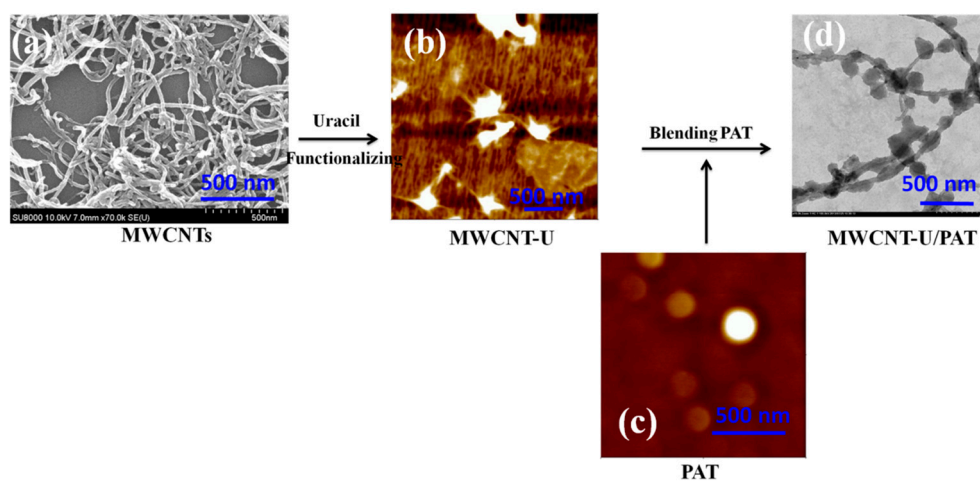

**Figure S5.** The structure for (a) CNT-COOH (SEM); (b) CNT-U (AFM); (c) PAT (AFM) and (d) CNT-U/PAT (TEM).

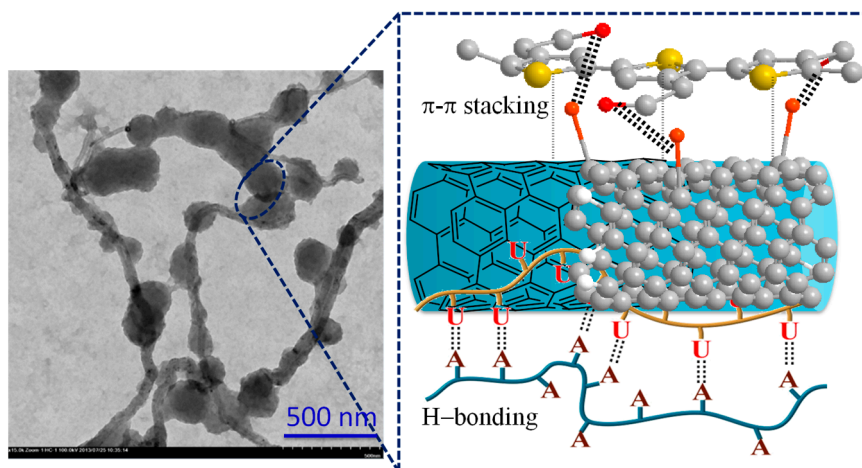

**Figure S6.** Shows the  $\pi$ -stacking interactions between the surface of CNT-U and the thiophene rings of PAT; the U $\cdots$ A multiple hydrogen bond interaction enhanced the dispersion of CNT-U in the PAT solution.
